# Supplementary material for: Subcellular Remodeling in Filamin C Deficient Mouse Hearts Impairs Myocyte Tension Development during Progression of Dilated Cardiomyopathy
Source: MDPI journal article supplement (doi:10.3390/ijms23020871), 2022-01-14
Supplement: s1 [file s1]

## Supplemental Information – Powers et al.

### Supplemental Tables

Table S1. Primary antibodies used for immunofluorescence imaging of adult cardiomyocytes.

| 1° Antibody             | Species | Dilution | Vendor        | Product Number |
|-------------------------|---------|----------|---------------|----------------|
| anti-FLNC               | Rabbit  | 1:50     | Sigma-Aldrich | HPA006135      |
| anti- $\alpha$ -Actinin | Mouse   | 1:500    | Sigma-Aldrich | A7811          |

Table S2. Secondary antibodies used for immunofluorescence imaging of adult cardiomyocytes.

| 2° Antibody | Species | Label           | Dilution | Vendor       | Product Number |
|-------------|---------|-----------------|----------|--------------|----------------|
| anti-Rabbit | Goat    | Texas Red       | 1:500    | ThermoFisher | T2767          |
| anti-Mouse  | Goat    | Alexa Fluor 700 | 1:500    | ThermoFisher | A21036         |

### Supplemental Figures

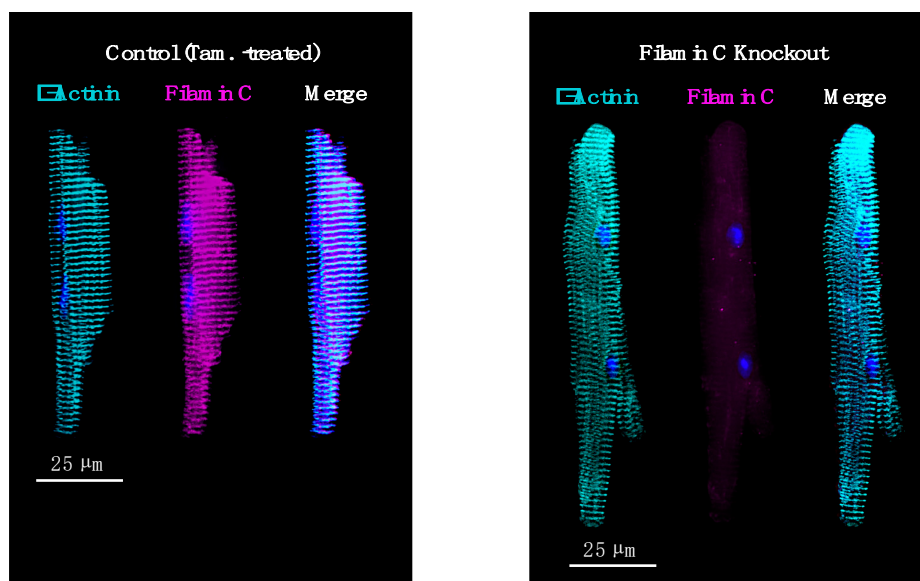

**Figure S1.** Representative immunofluorescent images of control (left) and FLNC-knockout (right) adult mouse ventricular cardiomyocytes, stained for the Z-disk protein  $\alpha$ -actinin (cyan), FLNC (magenta), and nuclei (DAPI, blue). Cardiomyocytes were isolated from the ventricles of 10-week-old adult male and female littermates 2 weeks post-injection with tamoxifen (injections at 8 weeks of age). See Materials and Methods for details.

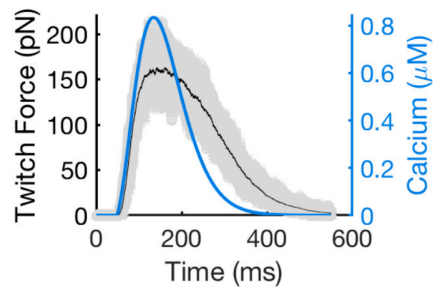

**Figure S2.** Computational model of cardiac twitch force. The blue trace corresponds to the calcium transient within the myofilament lattice (right abscissa) and the black trace is the average twitch force (left abscissa) over 50 twitch simulations (gray traces).
